# Supplementary material for: CAR+ and CAR- T cells differentiate into an NK-like subset that is associated with increased inflammatory cytokines following infusion
Source: Research Square preprint supplement (doi:10.21203/rs.3.rs-1495587/v1), 2022-04-14
Supplement: Supplementary file 1 [file 28613418255c62a6e8517d57.xlsx]

## Sheet: Curated gene sets
CD8 cytotoxic	NK receptor	NK-like cytotoxicity	NK_like_Suppressive	nk_like_activating	NKT	NK	NK_COMPLETE	Progenitor exhausted	Tcell exhaustion (ZhangCell2017)	Exhaustion
APOBEC3C	KIR2DL1	C1orf56	BTLA	C1orf56	CD3D	CCL3	CCL3	ARHGAP26	ACP5	CCL3
B2M	KIR2DL2	CCL3	CD160	CCL3	CD8A	CCL4	CCL4	CCR6	ADGRG1	CCL4
BLNK	KIR2DL3	CCL4	CD25	CCL4	GNLY	CST7	CCL5	CCR7	AFAP1L2	CD27
BLNK	KIR2DS1	CCL5	CTLA4	CD3D	NKG7	CTSW	CD160	CD22	AKAP5	CD28
CCL3	KIR2DS2	CD160	ENTPD1	CD8A	GZMH	FCER1G	CD244	CD81	BST2	CD38
CCL4	KIR3DL1	CD244	FAS	CD8B	FGFBP2	GNLY	CD247	CD83	CCL3	CTLA4
CCL5	KLRC1	CD247	FOXP3	CXCL1	CTSW	GZMA	CD3D	CD9	CCND2	CXCR5
CD8A	KLRC2	CD3D	IL10	EGR2	PRF1	GZMB	CTSW	CLDN10	CD27	CXCR6
CD8B	KLRC3	CTSW	IL4	FCER1G	GZMB	GZMH	CXCL1	CLYBL	CD27-AS1	ENTPD1
CSF1	KLRC4	CXCL1	KIR2DL1	FCGR3A	CCL4	KIR2DL4	EGR2	CNKSR3	CD2BP2	EOMES
CST7	KLRD1	EGR2	KIR2DL4	GNLY	FCGR3A	KLRB1	FCER1G	CXCL10	CD38	FASLG
FASLG	KLRF1	EGR2	KIR3DL2	IL2RA	IFITM2	KLRC3	FCGR3A	CXCR4	CD63	HAVCR2
GNLY	KLRK1	FCER1G	KIR3DL3	IRF4	CST7	KLRD1	FCRL6	CXCR4	CHST12	ID3
GZMA	LILRB1	FCGR3A	KLRC1	KLRC2	NCR3	KLRF1	GNLY	CXCR5	CREM	KLRB1
GZMB	NCAM1	FCRL6	KLRG1	KLRD1	KLRF1	KLRK1	GZMB	FAM213A	CSF1	LAG3
GZMH	NCR1	GNLY	PDCD1	KLRF1	HCST	NCAM1	GZMH	FAM84A	CTLA4	LAYN
GZMK	NCR2	HOPX	TGFB1	KLRK1	KLRD1	NKG7	GZMK	FHIT	CTSD	MAF
HLA-C	NKG7	ID2		LYZ	TYROBP	PRF1	GZMM	FOS	CXCL13	PDCD1
IFNG	KLRB1	IFNG		NCAM1	GZMK	PTGDS	ID2	FOXP1	CXCR6	PRDM1
ITGAM		IL18RAP		NCR1		SPON2	IFNG	ID3	DFNB31	PRDX5
KLRF1		IL2RA		NCR2		TYROBP	IL18RAP	IFIT3	DUSP4	TBX21
KLRG1		IL2RB		NCR3		XCL1	IL2RA	IGF1R	ENTPD1	TIGIT
KLRK1		IRF4		NKG7		XCL2	IL2RB	IL7R	ENTPD1-AS1	TIM
LYST		KIR2DL3		SIGLEC7		KLRC1	IRF4	ITGB1	FKBP1A	TNFRSF1B
NKG7		KIR3DL2		ZEB2		KLRC4	KIR2DL3	JUN	FUT8	TNFRSF9
PRF1		KLRB1					KIR3DL2	KBTBD11	GALM	TOX
TGFB1		KLRC1					KLRB1	KLF4	GZMB
TNF		KLRC2					KLRC1	KLHL6	HAVCR2
ZEB2		KLRC3					KLRC2	LEF1	HLA-DMA
		KLRC4					KLRC3	LRIG1	HLA-DRA
		KLRD1					KLRC4	LTA	HMGN3
		KLRD1					KLRD1	NR4A2	ICOS
		KLRF1					KLRF1	NTRK3	ID3
		KLRK1					KLRK1	PTPN2	IFI35
		LYZ					MYBL1	PTPN6	IFNG
		NCAM1					NCAM1	SATB1	IGFLR1
		NCR1					NCR1	SELL	IL2RB
		NCR2					NCR2	SOX4	ITGAE
		NCR3					NCR3	TBX21	ITM2A
		NKG7					NKG7	TCF7	LAG3
		PRF1					PRF1	TGFBR3	LAYN
		PTPN4					TNFAIP3	TOX	LINC00299
		SIGLEC7					XCL1		LYST
									MIR155HG
									MIR4632
									MS4A6A
									MTHFD1
									MTHFD2
									MYO1E
									MYO7A
									NAB1
									NDFIP2
		TNFAIP3					XCL2		PARK7
		ZEB2							PDCD1
									PHLDA1
									PKM
									PRDM1
									PRDX5
									PRF1
									PRKAR1A
									RAB27A
									RALGDS
									RGS1
									RGS2
									SARDH
									SIRPG
									SNAP47
									SNX9
									STAT3
									SYNGR2
									TIGIT
									TNFRSF1B
									TNFRSF9
									TOX
									TPI1
									TRAFD1
									UBE2F
									UBE2F-SCLY
									VAPA
									VCAM1
									WARS
									YARS
