# Supplementary material for: CAR+ and CAR- T cells differentiate into an NK-like subset that is associated with increased inflammatory cytokines following infusion
Source: Research Square preprint supplement (doi:10.21203/rs.3.rs-1495587/v1), 2022-04-14
Supplement: Supplementary file 3 [file b062f5563c61e06c8d97ddaf.docx]

**SUPPLEMENTARY TABLES**

**Table S1. Patients’ clinical information**

| **#** | **Age**  **(y)** | **Sex** | **Disease** | **Primary refractory** | **Prior auto** | **Matched**  **sibling allo conditioning** | **DLI** | **Prior blin** | **Total prior lines of therapy** | **Status at first dose CAR-T** | **Treated on-trial?**  **(reason off)** | **CAR19 T cell doses administered (lymphodepletion)** | **Best response^ (dose# acheived)** | **Duration of response (days)** | **CRS†** | **CAR T cell malignancy** |
| --- | --- | --- | --- | --- | --- | --- | --- | --- | --- | --- | --- | --- | --- | --- | --- | --- |
| P1 | 25 | F | B-ALL | No | No | MAC | No | Yes | 5 | Extramedullary | Yes | 1 × 107 cells/m2 (Flu/Cy) | CR (1) | 154 | Gr 1 | No |
| 5 × 107 cells/m2 (Cy) |
| 5 × 107 cells/m2 (Flu/Cy) |
| 1 × 108 cells/m2 (Flu/Cy) |
| P2 | 66 | M | DLBCL | Yes | BEAM | RIC | 3 | No | 8 | Stage IV | Yes | 1 × 107 cells/m2 (Flu/Cy) | PR (1) | 335* | No | 3.2 months |
| 5 × 107 cells/m2 (Cy) |
| 1 × 108 cells/m2 (Cy) |
| P3 | 61 | M | B-ALL | No | No | RIC | No | No | 4 | MRD + | Yes | 1 × 107 cells/m2 (Flu/Cy) | CR (1) | 105 | No | No |
| 5 × 107 cells/m2 (Cy) |
| 5 × 107 cells/m2 (Flu/Cy) |
| 1 × 108 cells/m2 (Flu/Cy) |
| P4 | 42 | M | B-ALL | No | No | MAC | No | Yes | 5 | CMR | No  (prior seizures) | 1 × 107 cells/m2 (Flu/Cy) | CR (1) | 230* | No | No |
| 5 × 107 cells/m2 (Flu/Cy) |
| 1 × 108 cells/m2 (Flu/Cy) |
| P5 | 18 | M | B-ALL | No, MRD+ | No | MAC | 3 | Yes | 5 | Blasts 70% | No  (IFI) | 1 × 107 cells/m2 (Flu/Cy) | CR (1) | 224* | Gr 3 | No |
| 1 × 107 cells/m2 (Flu/Cy) |
| 5 × 107 cells/m2 (Flu/Cy) |
| 1 × 108 cells/m2 (Cy) |
| A1 | 32 | M | DLBCL | Yes | No | N/A | N/A | No | 3 | Stage III | No | 1 × 107 cells/m2 (Flu/Cy) | PR (2) | 31 | No | No |
| 5 × 107 cells/m2 (Flu/Cy) |
| 38.6x106 cells/m2 (Flu/Cy) |
| P7 | 47 | M | B-ALL | No, MRD+ | No | MAC | No | Yes | 4 | BM: CMR  Occult extramedullary | Yes | 1 × 107 cells/m2 (Flu/Cy) | CR (1) | 125* | Gr 2 | No |
| P8 | 30 | M | B-ALL | No | No | MAC | No | Yes | 5 | MRD + | Yes | 1 × 107 cells/m2 (Flu/Cy) | CR (1) | 97* | No | 11.5 months |
|

**Table S2 Single cell multi-omics data generated in each sample**

| **Patient** | **Samples** | **Population** | **Days** | **Technologies** |
| --- | --- | --- | --- | --- |
| P1 | Infusion product | CAR T-cells | NA | 10x only + Rhapsody/AbSeq + CyTOF |
| Circulating | CAR T-cells | 13 | AbSeq/10x/RageSeq + CyTOF |
| Pre-chemo | PBMC | -3 | CyTOF |
| Pre-infusion | PBMC | -1 | AbSeq/10x/RageSeq + CyTOF + Cytokines |
| Post-infusion | PBMC | 7 | AbSeq/10x/RageSeq + Cytokines |
| Post-infusion | PBMC | 13 | AbSeq/10x/RageSeq + CyTOF + Cytokines |
| Post-infusion | PBMC | 28 | CyTOF + Cytokines |
| P2 | Infusion product | CAR T-cells | NA | AbSeq/10x/Ragseq + CyTOF + TCR beta deep sequencing |
| Circulating | CAR T-cells | 24 | AbSeq/10x + CyTOF + RageSeq |
| Pre-chemo | PBMC | -3 | CyTOF |
| Pre-infusion | PBMC | -1 | AbSeq/10x/RageSeq + CyTOF + Cytokines |
| Post-infusion | PBMC | 24 | AbSeq/10x + CyTOF + Cytokines |
| Post-infusion | PBMC | 31 | AbSeq/10x/RageSeq + CyTOF |
| P3 | Infusion product | CAR T-cells | NA | CyTOF |
| Circulating | CAR T-cells | 14 | CyTOF |
| Circulating | CAR T-cells | 24 | CyTOF |
| Pre-chemo | PBMC | -3 | CyTOF |
| Pre-infusion | PBMC | -1 | CyTOF+ Cytokine |
| Post-infusion | PBMC | 14 | CyTOF+ Cytokine |
| Post-infusion | PBMC | 24 | CyTOF+ Cytokine (D28) |
| P4 | Infusion product | CAR T-cells | NA | CyTOF |
| Circulating | CAR T-cells | 16 | CyTOF |
| Circulating | CAR T-cells | 28 | CyTOF |
| Pre-infusion | PBMC | -1 | CyTOF+ Cytokine |
| Post-infusion | PBMC | 16 | CyTOF+ Cytokine |
| Post-infusion | PBMC | 28 | CyTOF+ Cytokine |
| P5 | Infusion product | CAR T-cells | NA | CyTOF |
| Circulating | CAR T-cells | 11 | CyTOF |
| Circulating | CAR T-cells | 29 | CyTOF |
| Pre-infusion | PBMC | -1 | CyTOF+ Cytokine |
| Post-infusion | PBMC | 11 | CyTOF+ Cytokine (D10) |
| Post-infusion | PBMC | 29 | CyTOF+ Cytokine |
| A1 | Infusion product | CAR T-cells | NA | CyTOF |
| Circulating | CAR T-cells | 17 | CyTOF |
| Circulating | CAR T-cells | 28 | CyTOF |
| Pre-infusion | PBMC | -1 | CyTOF+ Cytokine |
| Post-infusion | PBMC | 17 | CyTOF+ Cytokine |
| Post-infusion | PBMC | 28 | CyTOF+ Cytokine |
| P7 | Infusion product | CAR T-cells | NA | AbSeq/Rhapsody + CyTOF |
| Circulating | CAR T-cells | 24 | AbSeq/10x/RageSeq+ CyTOF |
| Pre-infusion | PBMC | -1 | AbSeq/10x/RageSeq + CyTOF + Cytokine |
| Post-infusion | PBMC | 24 | AbSeq/10x/RageSeq + CyTOF + Cytokine |
| P8 | Infusion product | CAR T-cells | NA | AbSeq/Rhapsody + CyTOF + TCR beta deep sequencing |
| Circulating | CAR T-cells | 8 | AbSeq/10x/RageSeq + CyTOF |
| Pre-infusion | PBMC | -1 | AbSeq/10x/RageSeq + CyTOF + Cytokine |
| Post-infusion | PBMC | 8 | AbSeq/10x/RageSeq + CyTOF + Cytokine |
| Post-infusion | PBMC | 21 | Abseq/10x |
| Healthy | NA | PBMC | NA | 10x only |

**Table S3. Oligonucleotide-conjugated antibody (Abseq)**

| **Target** | **Clone** | **Barcode ID (precommercial)** | **Catalogue number** |
| --- | --- | --- | --- |
| CD127 | HIL-7R-M21 | AHS0028 | 940012 |
| CD14 | MϕP9 | AHS0037 | 940005 |
| CD161 | DX12 | AHS0002 | 940070 |
| CD183 | 1C6/CXCR3 | AHS0031 | 940030 |
| CD185 (CXCR5) | RF8B2 | AHS0039 | 940042 |
| CD19 | HIB19 | (v2a_Hs_0030) |  |
| CD194 | 1G1 | AHS0038 | 940047 |
| CD196 (CCR6) | 11A9 | AHS0034 | 940033 |
| CD197 (CCR7) | 150503 | (v2a_Hs_007) |  |
| CD25 | M-A251 | (v2a_Hs_0026) |  |
| CD27 | M-T271 | AHS0025 | 940018 |
| CD28 | CD28.2 | AHS0024 | 940017 |
| CD3 | SK7 | AHS0033 | 940000 |
| CD38 | HIT2 | AHS0022 | 940013 |
| CD4 | SK3 | AHS0032 | 940001 |
| CD45RA | HI100 | AHS0009 (v2a_Hs_0029) | 940011 |
| CD45RO | UCHL1 | AHS0036 | 940022 |
| CD8 | RPA-T8 | AHS0027 | 940003 |
| CD95 | DX2 | AHS0023 | 940037 |
| HLA-DR | G46-6 | (v2a_Hs_0035) |  |
| PD1 (CD279) | MIH4 | (v2a_Hs_0014) |  |
| CD10 | HI10a | AHS0051 | 940045 |
| CD11b | M1/70 | AHS0005 | 940008 |
| CD11c | B-ly6 | AHS0056 | 940024 |
| CD137 | 4B4-1 | AHS0003 | 940055 |
| CD141 | 1A4 | AHS0083 | 940079 |
| CD154 | TRAP1 | AHS0077 | 940053 |
| CD16 | 3G8 | AHS0053 | 940006 |
| CD20 | 2H7 | AHS0008 | 940016 |
| CD206 | 19.2 | AHS0072 | 940068 |
| CD21 | B-ly4 | AHS0074 | 940048 |
| CD274 (B7-H1) | MIH1 | AHS0004 | 940035 |
| CD40 | 5C3 | AHS0117 | 940049 |
| CD56 | NCAM16.2 | AHS0019 | 940007 |
| CD80 (B7-1) | L307.4 | AHS0046 |  |
| CD86 (B7-2) | 2331 (FUN-1) | AHS0057 | 940025 |
| IgD | IA6-2 | AHS0058 | 940026 |
| IgG | G18-145 | AHS0059 | 940027 |
| LAG-3 (CD223) | T47-530 | AHS0018 | 940080 |
| TIM-3 (CD366) | 7D3 | AHS0016 | 940066 |
| CD19 | SJ25C1 | AHS0030 | 940004 |
| CD25 | 2A3 | AHS0026 | 940009 |
| CD197 (CCR7) | 3D12 | AHS0007 | 940014 |
| PD1 (CD279) | EH12.1 | AHS0014 | 940015 |

##

**Table S4. List of antibodies used in mass cytometry**

| **Conjugated label** | **Specificity** | **Antibody clone** | **Manufacturer** | **Comment** |
| --- | --- | --- | --- | --- |
| 104 | CD45 | HI30 | BD | CAR T product barcode |
| 110 | CD45 | HI30 | BD | Donor PBMC barcode |
| 113 | CD56 | REA196 | Miltenyi |  |
| 115 | CD8A | RPA-T8 | Biolegend |  |
| 139 | CD57 | HCD57 | Biolegend |  |
| 141 | CD49d | 9F10 | DVS/Fluidigm |  |
| 142 | CD19 | HIB19 | BD |  |
| 143 | CD45RA | HI100 | Biolegend |  |
| 144 | CD69 | FN50 | Biolegend |  |
| 145 | CD4 | RPA-T4 | BD |  |
| 146 | EOMES | WD1928 | Life Technologies | Intracellular |
| 147 | CD185 (CXCR5) | RF8B2 | BD |  |
| 148 | CD28 | CD28.2 | Biolegend | MMM |
| 149 | CD366 (TIM3) | 7D3 | BD | MMM |
| 150 | KLRG1 | SA231A2 | Biolegend | MMM |
| 151 | CD39 | A1 | Biolegend | MMM |
| 152 | CD45RO | UCHL1 | BD |  |
| 153 | CD62L | DREG-56 | Biolegend |  |
| 154 | CD196 (CCR6) | REA190 | Miltenyi |  |
| 155 | CD137 (4-1BB) | 4B4-1 | BD | MMM |
| 156 | CD279 (PD1) | EH12.2H7 | Biolegend | MMM |
| 158 | CD194 (CCR4) | L291H4 | Biolegend |  |
| 159 | CD197 (CCR7) | 150503 | R&D Systems |  |
| 160 | CD223 (Lag3) | 17B4 | Nobus Bio | MMM |
| 161 | CD122 (IL-2RB) | TU27 | Biolegend | MMM |
| 162 | Foxp3 | PCH101 | eBioscience | Intracellular |
| 163 | CD183 (CXCR3) | REA232 | Miltenyi |  |
| 164 | CD274 (PDL1) | MIH1 | BD | MMM |
| 165 | CD16 | 3G8 | DVS/Fluidigm |  |
| 166 | TIGIT | MBSA43 | RIZO | MMM |
| 167 | CAR T | 136.20.1 | MDACC |  |
| 168 | Ki67 | B56 | BD | Intracellular |
| 169 | CD25 | M-A251 | Biolegend |  |
| 170 | CD3 | UCHT1 | BD |  |
| 171 | Granzyme B | GB11 | Acris | Intracellular |
| 172 | CD38 | HIT2 | DVS/Fluidigm |  |
| 173 | Integrin b7 | FIB504 | BD |  |
| 174 | HLA-DR | G46-6 | BD |  |
| 175 | Perforin | B-D48 | DVS/Fluidigm | Intracellular |
| 176 | CD127 | A019D5 | Biolegend |  |
| 209 | T-bet | 4B10 | BD | Intracellular |

The following tables have been uploaded as csv files due to their large size.

**Table S5 Differentially expressed genes, see excel spreadsheet containing all the results.**

**Table S6 Gene set enrichment analysis of differentially expressed genes.**

**Table S7 TCR sequences interrogated with VDJdb for known antigen specificity.**

**Table S8 List of curated gene signatures utilised to calculate gene modules’ scores.**
